# Supplementary material for: Stearic acid modified nano CuMOFs used as a nitric oxide carrier for prolonged nitric oxide release
Source: Royal Society of Chemistry journal article supplement (doi:10.1039/d1ra08066k), 2022-01-01
Supplement: d1ra08066k1.pdf [file d1ra08066k1.pdf]

**Supplementary Information:**

**Stearic Acid Modified Nano CuMOFs Used as Nitric Oxide Carrier for Prolonged Nitric Oxide Release**

*Maotao Huang<sup>1</sup>, Jianwen Zhang<sup>1</sup>, Xianlan Ke<sup>1</sup>, Shuai Gao<sup>2</sup>, Dimeng Wu<sup>2</sup>, Junying Chen<sup>1\*</sup>, Yajun Weng<sup>1\*</sup>*

- 1. Key Laboratory of Advanced Technologies of Materials, Ministry of Education, School of Materials Science and Engineering, Southwest Jiaotong University, Chengdu, PR China*
- 2. Chengdu Daxan Innovative Medical Tech. Co., Ltd., Chengdu, PR China*

*Co-first authors: Maotao Huang and Jianwen Zhang have contributed equally to this work.*

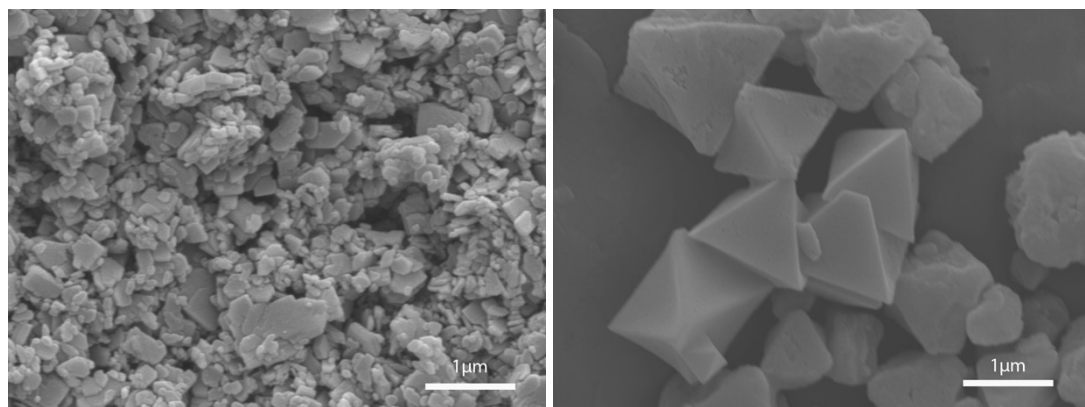

Fig. S1 SEM images of Cu(NH<sub>2</sub>TPA) (left), CuBTC (right), at 20,000× magnification.

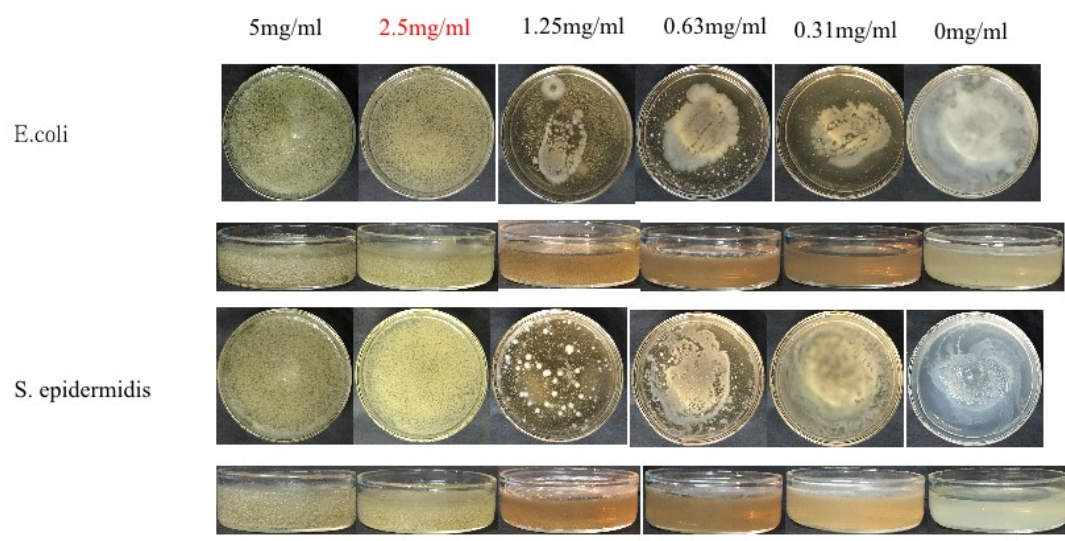

Fig. S2 The detection of the minimum inhibitory concentration of NO@SA<sub>3</sub>@CuMOFs.
